# Supplementary material
Source: PubMed Central journal article supplement (PMC9342421)

**Disclosure Purpose:** 22-03209

Summary of Interests

I do not have any interests to disclose at this time.

Additional Questions:

- 1. **Are there other relationships or activities that readers could perceive to have influenced, or that give the appearance of potentially influencing, what you wrote in the submitted work?**  
No.
- 2. **What is the manuscript title?**  
Effectiveness of BNT162b2 Vaccine against Omicron in Children 5 to 11 Years
- 3. **Are you the corresponding author?**  
No.

Certification

I certify that the information provided in this disclosure is complete and accurate.

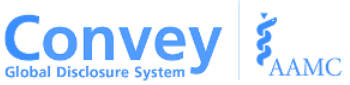

**Disclosure Purpose:** 22-03209

### Summary of Interests

I do not have any interests to disclose at this time.

### Additional Questions:

- Are there other relationships or activities that readers could perceive to have influenced, or that give the appearance of potentially influencing, what you wrote in the submitted work?**  
No.
- What is the manuscript title?**  
Effectiveness of BNT162b2 Vaccine against Omicron in Children 5 to 11 Years
- Are you the corresponding author?**  
No.

### Certification

I certify that the information provided in this disclosure is complete and accurate.

**Disclosure Purpose:** 22-03209

**Summary of Interests**

I do not have any interests to disclose at this time.

**Additional Questions:**

- 1. **Are there other relationships or activities that readers could perceive to have influenced, or that give the appearance of potentially influencing, what you wrote in the submitted work?**  
No.
- 2. **What is the manuscript title?**  
Effectiveness of BNT162b2 Vaccine against Omicron in Children 5 to 11 Years
- 3. **Are you the corresponding author?**  
No.

**Certification**

I certify that the information provided in this disclosure is complete and accurate.

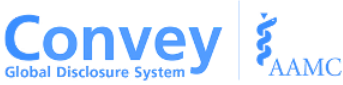

**Disclosure Purpose:** 22-03209

Summary of Interests

I do not have any interests to disclose at this time.

Additional Questions:

- 1. **Are there other relationships or activities that readers could perceive to have influenced, or that give the appearance of potentially influencing, what you wrote in the submitted work?**  
No.
- 2. **What is the manuscript title?**  
Effectiveness of BNT162b2 Vaccine against Omicron in Children 5 to 11 Years
- 3. **Are you the corresponding author?**  
No.

Certification

I certify that the information provided in this disclosure is complete and accurate.



**Disclosure Purpose:** 22-03209

### Summary of Interests

I do not have any interests to disclose at this time.

### Additional Questions:

- Are there other relationships or activities that readers could perceive to have influenced, or that give the appearance of potentially influencing, what you wrote in the submitted work?**  
No.
- What is the manuscript title?**  
Effectiveness of BNT162b2 Vaccine against Omicron in Children 5 to 11 Years
- Are you the corresponding author?**  
No.

### Certification

I certify that the information provided in this disclosure is complete and accurate.

**Disclosure Purpose:** 22-03209

Summary of Interests

I do not have any interests to disclose at this time.

Additional Questions:

- Are there other relationships or activities that readers could perceive to have influenced, or that give the appearance of potentially influencing, what you wrote in the submitted work?**  
No.
- What is the manuscript title?**  
Effectiveness of BNT162b2 Vaccine against Omicron in Children 5 to 11 Years
- Are you the corresponding author?**  
Yes.
  - Please list the other authors' names here.**  
Alex R Cook, Derrick Heng, Benjamin Ong, David Chien Lye, Kelvin Bryan Tan

Certification

I certify that the information provided in this disclosure is complete and accurate.

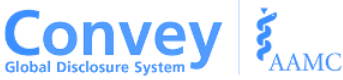

Supplement: NEJMoa2203209_disclosures.pdf [file NEJMoa2203209_disclosures.pdf]
